# Supplementary material for: Contribution of Host Genetics to the Variation of Microbial Composition of Cecum Lumen and Feces in Pigs
Source: Front Microbiol. 2018 Oct 31;9:2626. doi: 10.3389/fmicb.2018.02626 (PMC6220110; doi:10.3389/fmicb.2018.02626)
Supplement: Table S3 — Host genomic loci and candidate genes identified by GWAS for OTUs in fecal samples. [file Table_3.XLSX]

## Sheet: Table S3
Table S3. Host genomic loci and candidate genes identified by GWAS for OTUs in fecal samples
OTU ID and annotated bacteria	Position1	Significant SNP number2	P value 3	Nearest gene4	Functional annotation or Phenotype in MGI database	GWAS model	Functional category
Otu151_Bacteria	SSC18: 2.59 Mb	8	1.8e-08	SHH	abnormal digestive system morphology; abnormal colon morphology	binary	digestive system morphology
Otu199_Prevotella	SSC7: 27.54 Mb	5	5.92e-09	LST1	abnormal colon morphology;abnormal adaptive immunity	quantitative	immune
Otu555_RF39	SSC14: 13.52 Mb	4	1.27e-08	FZD3	decreased pro-B cell number;decreased B cell number;abnormal lymph node morphology	quantitative	immune
Otu333_Acholeplasmatales	SSC9: 117.41 Mb	12	2.48e-08	PIK3CG	abnormal immune cell physiology;abnormal inflammatory response	quantitative	immune
Otu3265_Ruminococcaceae	SSC7: 52.32 Mb	4	7.18e-08	IL17A	abnormal immune system physiology; abnormal effector T cell morphology	quantitative	immune
Otu2811_Ruminococcaceae	SSC4: 93.61 Mb	10	2.01e-07	PBX1	pre-B-cell leukemia homeobox 1	quantitative	immune
Otu1868_Clostridiales	SSC13: 197.68 Mb	5	4.56e-08	JAM2	This gene belongs to the immunoglobulin superfamily, and the junctional adhesion molecule (JAM) family. It acts as an adhesive ligand for interacting with a variety of immune cell types, and may play a role in lymphocyte homing to secondary lymphoid organs	binary	immune
Otu3061_Lachnospiraceae	SSC14: 29.6 Mb	13	6.57e-08	TMEM132B	TMEM132: an ancient architecture of cohesin and immunoglobulin domains define a new family of neural adhesion molecules	binary	immune
Otu892_Ruminococcaceae	SSC9: 66.38 Mb	6	2.23e-08	NTM	This gene encodes a member of the IgLON (LAMP, OBCAM, Ntm) family of immunoglobulin (Ig) domain-containing glycosylphosphatidylinositol (GPI)-anchored cell adhesion molecules.	quantitative	immune
Otu865_Ruminococcaceae	SSC9: 123.06 Mb	16	1.84e-10	TPK1	The protein encoded by this gene functions as a homodimer and catalyzes the conversion of thiamine to thiamine pyrophosphate, a cofactor for some enzymes of the glycolytic and energy production pathways.	quantitative	metabolism
Otu486_Ruminococcaceae	SSC5: 13.33 Mb	29	2.57e-09	NUAK1	improved glucose tolerance;increased insulin sensitivity	quantitative	metabolism
Otu151_Bacteria	SSC2: 134.9 Mb	5	1.71e-08	ALDH7A1	aldehyde dehydrogenase 7 family member A1	binary	metabolism
Otu3265_Ruminococcaceae	SSC14: 141.69 Mb	4	2.58e-08	PLPP4	Catalyzes the conversion of phosphatidic acid to diacylglycerol	quantitative	metabolism
Otu1944_Prevotella	SSC8: 112.22 Mb	11	2.78e-08	FABP2	Fatty acid-binding protein intestinal; abnormal circulating lipid level;increased circulating insulin level	quantitative	metabolism
Otu95_Bacteroidales	SSC13: 174.57 Mb	10	3.67e-08	FGF12	its related pathways are PI3K-Akt signaling pathway and MAPK signaling pathway. GO annotations related to this gene include growth factor activity and ion channel binding.	quantitative	metabolism
Otu134_Ruminococcus	SSC7: 14.64 Mb	4	5.54e-08	KDM1B	lysine (K)-specific demethylase 1B	quantitative	metabolism
Otu269_Lachnospiraceae	SSC18: 10.73 Mb	8	1.19e-07	KLRG2	GO annotations related to this gene include carbohydrate binding	quantitative	metabolism
Otu337_S24-7	SSC7: 16.91 Mb	8	1.21e-07	CDKAL1	abnormal glucose homeostasis;abnormal insulin secretion;decreased CD4-positive, CD25-positive, alpha-beta regulatory T cell number. Genome-wide association studies have linked single nucleotide polymorphisms in an intron of this gene with susceptibilty to type 2 diabetes	binary	metabolism
Otu1177_Treponema	SSC1: 63.23 Mb	4	1.49e-07	CNR1	increased insulin sensitivity;abnormal gastrointestinal motility	binary	metabolism
Otu2094_Bacteria	SSC7: 31.92 Mb	6	4.5e-08	KHDRBS2	KH domain containing RNA binding signal transduction associated 2	quantitative	signal transduction
Otu2774_Ruminococcaceae	SSC7: 76.13 Mb	36	5.71e-08	NOVA1	association with immune cell dysregulation	quantitative	immune
Otu1709_Ruminococcaceae	SSC7: 78.32 Mb	10	2.48e-07	NOVA1	association with immune cell dysregulation	quantitative	immune
Otu727_Proteobacteria	SSC18: 29.52 Mb	17	3.67e-10	LSM8	Increased vaccinia virus infection; Decreased infection with West Nile virus	quantitative	infection
Otu107_Prevotella	SSC7: 23.52 Mb	4	5.14e-08	OR2B6	olfactory receptor family 2B subfamily member 6	quantitative	olfactory receptor
Otu151_Bacteria	SSC4: 16.46 Mb	6	1.5e-08	ANXA13	This gene encodes a member of the annexin family. Members of this calcium-dependent phospholipid-binding protein family play a role in the regulation of cellular growth and in signal transduction pathways	binary	signal transduction
Otu319_Lachnospiraceae	SSC6: 105.77 Mb	7	2.48e-08	CDH2	encodes a preproprotein that is proteolytically processed to generate a calcium-dependent cell adhesion molecule and glycoprotein.	quantitative	signal transduction
Otu492_Bacteria	SSC10: 55.28 Mb	9	3.52e-08	GPR158	G protein-coupled receptor 158	quantitative	signal transduction
Otu2593_Bacteria	SSC12: 48.08 Mb	6	2.43e-07	SLC6A4	solute carrier family 6 (neurotransmitter transporter) member 4; This gene encodes an integral membrane protein that transports the neurotransmitter serotonin from synaptic spaces into presynaptic neurons.	quantitative	signal transduction
Otu711_Christensenellaceae	SSC2: 100.02 Mb	43	2.13e-09	LincRNA	None	binary	unknown
Otu86_Bacteroidales	SSC7: 18.68 Mb	6	1.11e-08	HDGFL1	Decreased IL-8 secretion in GenomeRNAi human phenotypes for HDGFL1	quantitative	immune
Otu492_Bacteria	SSC1: 284.11 Mb	3	3.88e-08	KIAA1958	unknow	quantitative	unknown
Otu3354_YS2	SSC2: 125.08 Mb	7	4.27e-08	LVRN	GO annotations related to this gene include metallopeptidase activity	quantitative	metabolism
Otu633_Ruminococcus	SSC14: 15.26 Mb	5	4.34e-08	SOX7	homeostasis/metabolism phenotype	quantitative	metabolism
Otu505_RF39	SSC16: 63.42 Mb	6	4.42e-08	MAT2B	its related pathways are Metabolism and superpathway of methionine degradation	binary	metabolism
Otu675_Ruminococcaceae	SSC2: 127.15 Mb	20	5.1e-08	CSNK1G3	immune system phenotype (increased eosinophil cell number)	quantitative	immune
Otu664_Oscillospira	SSC10: 22.16 Mb	5	1.52e-07	CCDC185	coiled-coil domain containing 185	binary	unknown
Otu1644_Lachnospiraceae	SSC5: 99.73 Mb	4	1.54e-07	C12orf50	chromosome 12 open reading frame 50	quantitative	unknown
note: 1. Position of the most significant SNPs
2. the number of SNPs achieving significant thresholds based on bonferoni correction
3. P values of the most significant SNPs
4. the genes nearest to the top SNPs
5. significant association was derived from quantitative model or binary model in GWAS
