# Supplementary material for: Contribution of Host Genetics to the Variation of Microbial Composition of Cecum Lumen and Feces in Pigs
Source: Front Microbiol. 2018 Oct 31;9:2626. doi: 10.3389/fmicb.2018.02626 (PMC6220110; doi:10.3389/fmicb.2018.02626)
Supplement: Table S4 — Host genomic loci and candidate genes identified by GWAS for OTUs in cecum luminal samples. [file Table_4.XLSX]

## Sheet: Sheet1
Table S4. Host genomic loci and candidate genes identified by GWAS for OTUs in cecum luminal samples
OTU ID	Position1	Significant SNP number2	P value 3	Nearest gene4	Functional annotation or Phenotype in MGI database	GWAS model5	Functional category
Otu29_Turicibacter	SSC10: 56.21 Mb	15	1.27e-10	KIAA1217	associated with severe early-onset obesity in human GWAS	quantitative	obesity
Otu620_Ruminococcaceae	SSC9: 18.49 Mb	12	3.25e-09	FAM181B	family with sequence similarity 181 member B	quantitative	unknown
Otu1088_Spirochaetaceae	SSC4: 11.03 Mb	8	4.87e-09	GSDMC	Colorectal Cancer Proliferation, eosinophil percentage of leukocytes	binary	immune
Otu1116_Christensenellaceae	SSC6: 140.68 Mb	32	4.94e-09	HOOK1	a gene required for endocytic trafficking	quantitative	endocytic trafficking
Otu1105_Lachnospiraceae	SSC2: 140.39 Mb	15	5.18e-09	IL4, IL5, IL13	abnormal immune system physiology	binary	immune
Otu1084_Oscillospira	SSC1: 192.35 Mb	8	5.73e-09	LRFN5	LRFN5 limits Tcell response and neuroinflammation	binary	immune
Otu620_Ruminococcaceae	SSC13: 20.59 Mb	4	7.29e-09	GPD1L	Among its related pathways are Metabolism and Regulation of lipid metabolism by Peroxisome proliferator-activated receptor alpha (PPARalpha).	quantitative	Metabolism
Otu880_Lachnospiraceae	SSC15: 147.83 Mb	4	9.39e-09	SAG	Associated with Crohn's disease	binary	immune
Otu1116_Clostridiales	SSC4: 129.22 Mb	3	9.86e-09	CDC14A	Human phosphatase CDC14A is recruited to the cell leading edge to regulate cell migration and adhesion	quantitative	cell migration and adhesion
Otu302_Coriobacteriaceae	SSC3: 133.15 Mb	18	1.13e-08	NTSR2	The protein encoded by this gene belongs to the G protein-coupled receptor family that activate a phosphatidylinositol-calcium second messenger system; Neurotensin (NT) is a brain and gastrointestinal peptide that acts on three subtypes of neurotensin receptors: the G-protein-coupled receptors NTS1 (high affinity) and NTS2 (low affinity) and the single transmembrane receptor NTS3	quantitative	signal transduction
Otu344_Prevotella	SSC6: 40.12 Mb	30	1.55e-08	FXYD3	its related pathways are Cardiac conduction and Transport of glucose and other sugars, bile salts and organic acids, metal ions and amine compounds	quantitative	metabolism
Otu95_Bacteroidales	SSC6: 55.26 Mb	26	2.52e-08	NLRP11	This gene has been shown to regulate caspases in the proinflammatory signal transduction pathway and, based on studies of other members of the NLRP gene family with similar domain structure, is predicted to form part of the multiprotein inflammasome complex.	binary	immune
Otu220_Bacteroidales	SSC9: 124.55 Mb	6	3.08e-08	TPK1	The protein encoded by this gene functions as a homodimer and catalyzes the conversion of thiamine to thiamine pyrophosphate, a cofactor for some enzymes of the glycolytic and energy production pathways.	binary	metabolism
Otu1606_YS2	SSC15: 27.44 Mb	14	4.19e-08	CCDC93	coiled-coil domain containing 93	binary	unknown
Otu760_Clostridiales	SSC10: 69.78 Mb	10	4.52e-08	ITIH5	inter-alpha-trypsin inhibitor heavy chain family member 5	quantitative	metabolism
Otu3231_Lachnospiraceae	SSC1: 66.32 Mb	9	5.56e-08	EPHA7	this gene is related to transferase activity, transferring phosphorus-containing groups and protein tyrosine kinase activity. In human, it is associated with survival on dialysis in African-Americans with type 2 diabetes;	quantitative	metabolism
Otu156_Ruminococcus	SSC17: 5.06 Mb	5	6.2e-08	FGF20	The fibroblast growth factors possess broad mitogenic and cell survival activities, and are involved in a variety of biological processes including embryonic development, cell growth, morphogenesis	binary	Abnormality of the intestine, to be protective against gastrointestinal diseases such as inflammatory bowel diseases
Out263_Bacteroidales	SSC3: 83.1 Mb	8	7.66753e-08	EHBP1	In humans, this region is associated with Crohn's disease in Ashkenazi Jewish	quantitative	Crohn's disease
Otu247_Mogibacteriaceae	SSC3: 72.68 Mb	4	7.93e-08	EGR4	its related pathways are Downstream signaling in naive CD8+ T cells and Calcineurin-regulated NFAT-dependent transcription in lymphocytes.	binary	immune
Otu220_Bacteroidales	SSC9: 138.66 Mb	6	8.27e-08	FAM129A	Novel genetic loci identified for the pathophysiology of childhood obesity	quantitative	obesity
Otu1213_S24-7	SSC9: 132.87 Mb	7	9.83e-08	SOAT1	increased circulating cholesterol level; abnormal lipid homeostasis	binary	metabolism
Otu103_Coprococcus	SSC11: 3.61 Mb	20	9.94e-08	CDK8	the Mediator-associated kinase CDK8, and its paralog CDK19, as negative regulators of IL-10 production during innate immune activation	quantitative	immune
Otu858_Clostridiales	SSC4: 62.31 Mb	9	1.14e-07	STMN2	GO annotations related to this gene include calcium-dependent protein binding and tubulin binding	binary	signal transduction
Otu570_S24-7	SSC1: 176.52 Mb	13	1.32e-07	TNFRSF11A	This receptor and its ligand are important regulators of the interaction between T cells and dendritic cells	binary	immune
Otu1105_Lachnospiraceae	SSC3: 105.91 Mb	7	1.86e-07	SLC8A1	associated with severe early onset obesity	binary	obesity
Otu1768_Clostridiales	SSC1: 55.94 Mb	7	1.93e-07	LMBRD1	its related pathways are Metabolism and Vitamin digestion and absorption. GO annotations related to this gene include insulin receptor binding and cobalamin binding	binary	metabolism
Otu3354_YS2	SSC14: 151.89 Mb	11	2.26e-07	TCERG1L	TCERG1L is associated with plasma adiponectin, a key modulator of obesity, inflammation, IR and diabetes	quantitative	immune
Otu1084_Oscillospira	SSC12: 61.28 Mb	3	2.54e-07	HS3ST3B1	its related pathways are Glycosaminoglycan metabolism and Metabolism	binary	metabolism
Otu760_Clostridiales	SSC5: 69.68 Mb	7	2.72e-07	SLC6A12	GO annotations related to this gene include neurotransmitter:sodium symporter activity and gamma-aminobutyric acid:sodium symporter activity.	quantitative	signal transduction
Otu1914_Bacteroidales	SSC14: 102.57 Mb	4	3e-07	ZWINT	ZW10 interacting kinetochore protein	binary	unknown
Otu1600_Blautia	SSC8: 108.74 Mb	6	3.42e-07	IL21	interleukin-21 precursor	binary	immune
Otu715_Ruminococcus	SSC5: 87.06 Mb	7	3.86e-07	SLC5A8	Acts as an electrogenic sodium (Na(+)) and chloride (Cl-)-dependent sodium-coupled solute transporter, including transport of monocarboxylates (short-chain fatty acids including L-lactate, D-lactate, pyruvate, acetate, propionate, valerate and butyrate), lactate, mocarboxylate drugs (nicotinate, benzoate, salicylate and 5-aminosalicylate) and ketone bodies (beta-D-hydroxybutyrate, acetoacetate an…	quantitative	metabolism
note: 1. Position of the most significant SNPs
2. the number of SNPs achieving significant thresholds based on bonferoni correction
3. P values of the most significant SNPs
4. the genes nearest to the top SNPs
5. significant association was derived from quantitative model or binary model in GWAS
